# Supplementary material for: Rate acceleration for 4,4′-dimethoxydiphenyl nitroxide mediated polymerization of methyl methacrylate
Source: Royal Society of Chemistry journal article supplement (doi:10.1039/c6ra20268c), 2016-01-01
Supplement: c6ra20268c1.pdf [file c6ra20268c1.pdf]

**Support Information for**

**Rate Acceleration for 4,4'-Dimethoxydiphenyl Nitroxide Mediated  
Polymerization of Methyl Methacrylate**

Zhecheng Zhu, Guorong Shan\*, Pengju Pan

*State Key Laboratory of Chemical Engineering, College of Chemical and Biological Engineering, Zhejiang  
University, 38 Zheda Road, Hangzhou 310027, China*

\*Corresponding Author

Tel.: +86-571-87951334; e-mail: shangr@zju.edu.cn

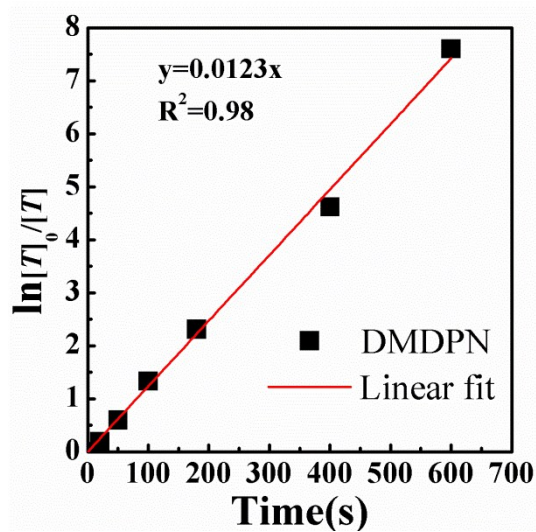

**Figure 1.** Evolution of  $\ln[T]_0/[T]$  vs time for the DMDPN decay with CSA in *tert*-butylbenzene at 110 °C.  $[DMDPN]_0=0.1$  mmol/L,  $[CSA]_0= 7.9$  mmol/L.

Figure 1: Sample of 1 mmol/L DMDPN in *tert*-butylbenzene with 7.9 mmol/L CSA (at the same concentration as Entry 4 used in the polymerization) were mixed and then placed in the ESR cavity maintained at 110°C. The concentration of DMDPN was determined from the ESR spectrum.

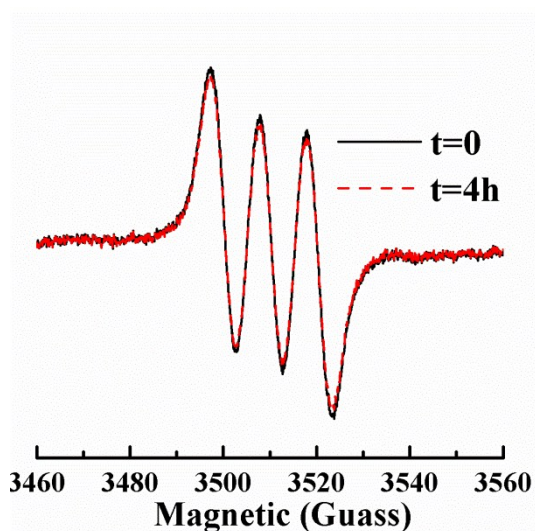

**Figure 2.** Growth of the ESR signal upon heating ( $T=110\text{ }^{\circ}\text{C}$ ) of the DMDPN with MN in *tert*-butylbenzene, before heating (solid line), 4h of heating (dashed line).  $[\text{DMDPN}]_0=0.1\text{ mmol/L}$ ,  $[\text{MN}]_0=35\text{ mmol/L}$ .

Figure 2: Sample of 0.1 mmol/L DMDPN in *tert*-butylbenzene with 35 mmol/L MN (at the same concentration as Entry 7 used in the polymerization) were mixed and then placed in the ESR cavity maintained at 110°C. The concentration of DMDPN was determined from the ESR spectrum.
